# Supplementary material for: A Toll-receptor map underlies structural brain plasticity
Source: eLife. 2020 Feb 18;9:e52743. doi: 10.7554/eLife.52743 (PMC7077983; doi:10.7554/eLife.52743)
Supplement: Supplementary file 2. — All details of the quantitative analyses including: genotypes, sample sizes, statistical tests carried out: normality tests, parametric and non-parametric tests for two or more samples, test results and p-value for whole data sets, and multiple comparison post-hoc correction tests and their p-values. [file elife-52743-supp2.xlsx]

## Sheet: Sheet1
SUPPLEMENTARY FILE 2
FIGURE	DATA	GENOTYPE OR EXPERIMENT	SAMPLE TYPE	COMPARISON	TEST	NORMALITY	HOMOGENEITY	DESCRIPTIVE	DF & TEST	p VALUE	MULTIPLE COMPARISONS
		TYPE	& N			TESTS	OF VARIANCE	STATISTICS	VALUE		POST-HOC CORRECTION
Fig.1		Genotype	Number of Adult brains
	Expression of Toll-1	anti-Toll in yw	8
	Expression of Toll-2	Toll-2 pTV Gal4 /UAS FlyBow [1.1 2906]	3
	Expression of Toll-3	UAS mtdTomato/+;Toll-3 Gal4 [MI02994]/+	2
	Expression of Toll-4	Toll-4GAL4/UAS-Flybow[[1.1 2906]	3
	Expression of Toll-5	Toll-5GAL4/UAS-Flybow[[1.1 2906]	5
	Expression of Toll-6	UAS mtdTomato /+;Toll-6 Gal4 [MI02127]/+	4
	Expression of Toll-7	Toll-7 Gal4 [MI13963] /UAS FlyBow [1.1 2906]	6
	Expression of Toll-8	UAS mtdTomato /+;Toll-8 Gal4 [MD806]	7
Fig.2A		Genotype	Number of Adult brains
	Expression of MyD88	MyD88 Gal4 [NP6394] /UAS mtdTomato	4
Fig.2D		Genotype	Number of Adult brains
	Expression of MyD88 cells	MyD88 Gal4 [NP6394] /UAS histone YFP	7
	doubled stained with Elav
	Expression of MyD88 cells	MyD88 Gal4 [NP6394] /UAS histone YFP	6
	doubled stained with Repo
Fig.2E		Genotype	Number of Adult brains
	Expression of Toll-2 cells	Toll-2 pTV Gal4 /UAS histone YFP	6
	doubled stained with Elav
	Expression of Toll-2 cells	Toll-2 pTV Gal4 /UAS histone YFP	6
	doubled stained with Repo
Fig.2G		Genotype	Number of pupal brains			Kolmogorov-Smirnov	F test	Mean±s.d.
	Counts of DCP1cells	MyD88 Gal4 [NP6394] /+	8		Unpaired t-test	>0.1	0.7918	568.3±39.89	t=2.376 df=17	0.0295	N/A
	in D1 pupal central brain	MyD88 Gal4 [NP6394]/+; UAS Toll-2 RNAi [HM05241]/+	11	UAS Toll-2 RNAi vs Control		>0.1		701.5±37.99
Fig.2H pupa		Genotype	Number of pupal brains			Kolmogorov-Smirnov	Bartlett's test	Mean±s.d.
	Counts of YFP cells	MyD88 Gal4 [NP6394] UAS histoneYFP/+	11	Each to control	One Way ANOVA	>0.1	0.9688	3838 ± 431.7	F=7.694 d.f.1=3; d.f.2=46	0.0003	Dunnett post-hoc
	in pupal central brain	MyD88 Gal4 [NP6394] UAS histoneYFP / UAS Toll-2 [EP709]	14	UAS Toll-2 to control		>0.1		3647 ± 388.6			0.54
		MyD88 Gal4 [NP6394] UAS histone YFP/+; UAS Toll-2 RNAi [HM05241]/+	10	UAS Toll-2 RNAi to control		>0.1		3080 ± 418.7			0.0005
		MyD88 Gal4 [NP6394] UAS histone YFP/+; UAS MyD88 RNAi [V25399]/+	15	UAS MyD88 RNAi to control		>0.1		3261 ± 445.1			0.0034
Fig.2H adult		Genotype	Number of adult brains			Kolmogorov-Smirnov	Bartlett's test	Mean±s.d.
	Counts of YFP cells	MyD88 Gal4 [NP6394] UAS histoneYFP/+	18	Each to control	One Way ANOVA	>0.1	0.0103	3356 ± 324.2	F=9.154 d.f.1=4; d.f.2=80	<0.0001	Dunnett post-hoc
	in adult central brain	MyD88 Gal4 [NP6394] UAS histoneYFP / UAS Toll-2 [EP709]	20	UAS Toll-2 to control		>0.1		3358 ± 458.6			>0.9999
		MyD88 Gal4 [NP6394] UAS histone YFP/+; UAS Toll-2 RNAi [HM05241]/+	17	UAS Toll-2 RNAi [HM05241] to control		>0.1		2841 ± 542.2			0.0009
		MyD88 Gal4 [NP6394] UAS histone YFP/ UAS Toll-2 RNAi [V36205]	15	UAS Toll-2 RNAi [36205] to control		>0.1		2875 ± 230.9			0.0031
		MyD88 Gal4 [NP6394] UAS histone YFP/+; UAS MyD88 RNAi [V25399]/+	15	UAS MyD88 RNAi to control		>0.1		3463 ±304.2			0.8527
Fig.2I pupa		Genotype	Number of KC cluster			Kolmogorov-Smirnov	Levene's test	Mean±s.d.
	Counts of YFP cells	Toll-2 pTV Gal4 UAS histone YFP/+	15	Each to control	Kruskal-Wallis test	> 0.1	N/A	1828 ± 185.8		0.0031	Dunn's
	in pupal MB	Toll-2 pTV Gal4 UAS histone YFP / UAS Toll-2 [EP709]	20	UAS Toll-2 to control		> 0.1		1894 ± 210.2			0.8576
		Toll-2 pTV Gal4 UAS histone YFP/+; UAS Toll-2 RNAi [HM05241]/+	13	UAS Toll-2 RNAi to control		> 0.1		1940 ± 192.9			0.4618
		Toll-2 pTV Gal4 UAS histone YFP/ 18wD7-35	28	18wD7-35 to control		Skewness -1.724, Kurtosis 7.019		2036 ± 144.5			0.0015
Fig.2I adult		Genotype	Number of KC cluster			Kolmogorov-Smirnov	Levene's test	Mean±s.d.
	Counts of YFP cells	Toll-2 pTV Gal4 UAS histone YFP/+	13	Each to control	Kruskal-Wallis test	> 0.1000	N/A	1956 ± 275.7		0.2161	Dunn's
	in adult MB	Toll-2 pTV Gal4 UAS histone YFP / UAS Toll-2 [EP709]	16	UAS Toll-2 to control		> 0.1000		2116 ± 205.9			0.3462
		Toll-2 pTV Gal4 UAS histone YFP/+; UAS Toll-2 RNAi [HM05241]/+	11	UAS Toll-2 RNAi to control		S= 1.822, K= 3.227		2273 ± 408.7			0.1354
		Toll-2 pTV Gal4 UAS histone YFP/ 18wD7-35	12	18wD7-35 to control		> 0.1000		2025 ± 367.7			0.8771
Fig.3A		Genotype	Number of pupal brains
	Expression of Toll-2	Toll-2 pTV Gal4 /UAS FlyBow [1.1 2906]	3
Fig.3B-H		Genotype	Number of pupal brains
	MARCM clone in D4 pupae	Elav Gal4, UAS mCD8 GFP, hs-FLP/Y; neoFRT 42D, tubpGal80/neoFRT42D	9
		Elav Gal4, UAS mCD8 GFP, hs-FLP/Y; neoFRT 42D, tubpGal80/neoFRT42D, Toll-2 pTV	7
Fig.3J		Genotype	Number of adult			Kolmogorov-Smirnov	Bartlett's test	Mean±s.d.
	Buridan arena test	Wild Type Berlin (WTB)	13	Each to control	One Way ANOVA	> 0.1000	0.0322	26.42±2.423	F=1.321 d.f.1=3, d.f.2=47	0.2788
	speed	Toll-2pTV/DfBSC22	8	Toll-2 pTV/DfBSC22 vs control		> 0.1000		25.87±4.499
		18wD7-35/DfBSC22	11	18wD7-35/DfBSC22 vs control		> 0.1000		27.18±6.084
		Tubulin Gal80ts/+; ElavGal4 / UAS Toll-2RNAi [HM05241]	11	tubGal80ts;Elav>Toll-2RNAi vs control		> 0.1000		29.27±4.941
Fig.3K		Genotype	Number of adult			Kolmogorov-Smirnov	Bartlett's test	Mean±s.d.
	Buridan arena test	Wild Type Berlin (WTB)	13	Each to control	One Way ANOVA	> 0.1000	0.7673	10459±2812	F=11.09, d.f.1=3, d.f.2= 47	<0.0001	Dunnett post-hoc
	distance	Toll-2pTV/DfBSC22	8	Toll-2 pTV/DfBSC22 vs control		> 0.1000		5139±3699			<0.001
		18wD7-35/DfBSC22	11	18wD7-35/DfBSC22 vs control		> 0.1000		5290±2840			<0.001
		Tubulin Gal80ts/+; ElavGal4 / UAS Toll-2RNAi [HM05241]	11	tubGal80ts;Elav>Toll-2RNAi vs control		> 0.1000		4250±2964			<0.0001
Fig.3L		Genotype	Number of adult			Kolmogorov-Smirnov	Bartlett's test	Mean±s.d.
	Buridan arena test	Wild Type Berlin (WTB)	13	Each to control	One Way ANOVA	> 0.1000	0.0009	48.15±16.10	F=5.585,d.f.1=3, d.f.2=47	<0.0023	Dunnett post-hoc
	No. of walking bouts	Toll-2pTV/DfBSC22	8	Toll-2 pTV/DfBSC22 vs control		> 0.1000		84.09±40.82			ns
		18wD7-35/DfBSC22	11	18wD7-35/DfBSC22 vs control		> 0.1000		80.15±33.07			ns
		Tubulin Gal80ts/+; ElavGal4 / UAS Toll-2RNAi [HM05241]	11	tubGal80ts;Elav>Toll-2RNAi vs control		> 0.1000		111.5±57.70			<0.001
Fig.3M		Genotype	Number of adult			Kolmogorov-Smirnov	Bartlett's test	Mean±s.d.
	Buridan arena test	Wild Type Berlin (WTB)	13	Each to control	Kruskal Wallis ANOVA	0.014	N/A	13.10±6.956	N/A	<0.0001	Dunn's post-hoc
	bout duration	Toll-2pTV/DfBSC22	8	Toll-2 pTV/DfBSC22 vs control		0.0483		4.380±4.570			<0.01
		18wD7-35/DfBSC22	11	18wD7-35/DfBSC22 vs control		> 0.1000		3.922±1.469			<0.01
		Tubulin Gal80ts/+; ElavGal4 / UAS Toll-2RNAi [HM05241]	11	tubGal80ts;Elav>Toll-2RNAi vs control		> 0.1000		1.992±0.8328			<0.0001
Fig.4A		Genotype	Number of adult brain			Kolmogorov-Smirnov	Levene's test	Mean±s.d.
	Counts of YFP cell	MyD88 Gal4 [NP6394] UAS histone YFP/+ ; tubulinGal80ts/+	10	Each to control	Kruskal-Wallis test	> 0.1000	N/A	597.5±76.02	N/A	< 0.0001	Dunn's
	in adult central	MyD88 Gal4 [NP6394] UAS histone YFP/UAS Toll-2 [EP709] ; tubulinGal80ts/+	11	UAS Toll-2 vs control		> 0.1000		1427±165.8			< 0.0001
	brain	MyD88 Gal4 [NP6394] UAS histone YFP/+; tubulinGal80ts / UAS Toll-2 RNAi [HM05241]	10	UAS Toll-2 RNAi vs control		P=0.013 S=1.036 K=-0.008512		893.7±146.3			0.0278
Fig.4B		Genotype	Number of adult MB cluster			Kolmogorov-Smirnov	Bartlett's test	Mean±s.d.
	Counts of YFP cell	Toll-2 pTV Gal4 UAS histone YFP/+ ; tubulinGal80ts/+	13	Each to control	One-Way ANOVA	0.0578	0.2689	1719±138.8	F=0.7316 d.f.1=2 d.f.2=34	0.4886	Dunnett post-hoc
	in adult MB	Toll-2 pTV Gal4 UAS histone YFP/UAS Toll-2 [EP709] ; tubulinGal80ts/+	12	UAS Toll-2 vs control		>0.1		1643±163.7			0.468
	cluster	Toll-2 pTV Gal4 UAS histone YFP/+; tubulinGal80ts / UAS Toll-2 RNAi [HM05241]	12	UAS Toll-2 RNAi vs control		>0.1		1718±223.2			> 0.9999
Fig.4C		Genotype	Number of adult OL			Kolmogorov-Smirnov	Bartlett's test	Mean±s.d.
	Counts of YFP cell	Toll-2 pTV Gal4 UAS histone YFP/+ ; tubulinGal80ts/+	17	Each to control	One-Way ANOVA	>0.1	0.2601	257.3±48.60	F= 36.17 d.f.1=2 d.f.2=41	< 0.0001	Dunnett post-hoc
	in adult optic lobe	Toll-2 pTV Gal4 UAS histone YFP/UAS Toll-2 [EP709] ; tubulinGal80ts/+	13	UAS Toll-2 vs control		>0.1		437.9±67.86			< 0.0001
	medulla	Toll-2 pTV Gal4 UAS histone YFP/+; tubulinGal80ts / UAS Toll-2 RNAi [HM05241]	14	UAS Toll-2 RNAi vs control		>0.1		262.4±74.51			0.9649
Fig.4D Activity		Genotype	Number of adult OL			Kolmogorov-Smirnov	F test	Mean±s.d.
	Counts of YFP cell	Toll-2 pTV Gal4 UAS histone YFP/+;tubulinGal80ts/+	16		unpaired t-test	>0.1	0.0008	459.5±49.65	t=2.836 df=16.37	0.0058	N/A
	in adult optic lobe	Toll-2 pTV Gal4 UAS histone YFP/UAS TrpA1;tubulinGal80ts/+	14	UAS TrpA1 vs control		0.066		563.2±128.7
	medulla
Fig.4D rescue
	Counts of YFP cell	Toll-2 pTV Gal4 UAS histone YFP/+;tubulinGal80ts/+	6		unpaired t-test	>0.1	0.9765	386.3±37.17	t=2.653 df=11	0.0225
	in adult optic lobe	Toll-2 pTV Gal4 UAS histone YFP/ UAS TrpA1;tubulinGal80ts/ Toll-2 RNAi [HM05241]	7	UAS TrpA1 Toll-2 RNAi vs control		>0.1		330.7±38.11
	medulla
Fig.4E		Genotype	Number of adult brain			Kolmogorov-Smirnov	Levene's test	Mean±s.d.
	Counts of YFP cell	MyD88 Gal4 [NP6394] UAS histoneYFP/+;tubulinGal80ts/+	10	Each to control	Kruskal-Wallis test	>0.1	N/A	556.5±78.51		< 0.0001	Dunn's
	in adult central	MyD88 Gal4 [NP6394] UAS histoneYFP; tubulinGal80ts/UAS Cactus RNAi [HMS00084]	14	UAS Cactus RNAi vs Control		>0.1		753.3 ±87.05			0.9856
	brain	UAS Dp110CAXX;MyD88 Gal4 [NP6394] UAS histone YFP/+; TubulinGal80ts/+	16	UAS PI3K vs Control		>0.1		758.9 ±94.03			0.012
		MyD88 Gal4 [NP6394] UAS histone YFP/UAS JNK RNAi [V34138]; Tubulin Gal80ts/+	15	UAS JNK RNAi vs Control		>0.1		1054 ±127.6			0.0006
		UAS Dp110CAXX;MyD88 Gal4 [NP6394] UAS histoneYFP/UAS JNK RNAi [V34138];tubulinGal80ts/UAS Cactus RNAi [HMS00084]	11	UAS PI3K UAS JNK RNAi UAS CactusRNAi vs Control		p=0.0101, S=1.029 K=-0.6603		811.5±264.0			0.5075
		MyD88 Gal4 [NP6394] UAS histone YFP/UAS MyD88 RNAi [V25402]; TubGal80ts/+	10	UAS MyD88 RNAi vs Control		>0.1		1310 ±114.5			< 0.0001
		MyD88 Gal4 [NP6394] UAS histone YFP/+; TubGal80ts/UAS Wek HA [NA12]	16	UAS Wek HA vs Control		>0.1		1308 ±164			< 0.0001
		MyD88 Gal4 UAS histoneYFP/UAS MyD88 RNAi [V25402];tubulinGal80ts/UAS wekHA [NA12]	10	UAS MyD88 RNAi UAS Wek vs Control		>0.1		1436±193.6			< 0.0001
Fig.4F		Genotype	Number of MB KC cluster			Kolmogorov-Smirnov	Bartlett's test	Mean±s.d.
	Counts of YFP cell	Toll-2pTV Gal4 UAS histoneYFP/+;tubulinGal80ts/+	12	Each to control	One Way ANOVA	>0.1	0.9707	1698±249.8	F=3.594, d.f.1=2, d.f.2=46	0.0354	Dunnett post-hoc
	in adult MB	Toll-2pTV Gal4 UAS histoneYFP/UAS MyD88 RNAi [V25402];tubulinGal80ts/UAS wekHA [NA12]	17			>0.1		1892±260.3			0.098
	KC cluster	UAS Dp110CAXX;Toll-2 pTV Gal4 UAS histoneYFP/UAS JNK RNAi [V34138];tubulinGal80ts/UAS Cactus RNAi [HMS00084]	20			>0.1		1674±267.0			0.9548
Fig.5A Pupal KC		Genotype	Number of MB KC cluster			Kolmogorov-Smirnov	Bartlett's test	Mean±s.d.
	Counts of YFP cell	Toll-2pTV Gal4 UAS histoneYFP/+	15		Mann-Whitney Test	p=0.0243, S=1.396, K=1.940	N/A	403.8±80.00		0.0004	N/A
	in D1 pupal MB KC	Toll-2pTV Gal4 UAS histoneYFP/+;UAS Rbf [280]/+	18	UAS Rbf to control		0.0804		301.9±78.84
	cluster
Fig.5A Adult central brain		Genotype	Number of adult brain			Kolmogorov-Smirnov	Bartlett's test	Mean±s.d.
	Counts of YFP cell	MyD88 Gal4 [NP6394] UAS histoneYFP/+;tubulinGal80ts/+	24		One Way ANOVA	>0.1	0.1995	585.8±117.9	F=177.4, d.f.1=2 d.f.2=45	< 0.0001	Bonferroni's
	in adult central	MyD88 Gal4 [NP6394] UAS histone YFP/UAS Toll-2 [EP709]; tubulinGl80ts/+	11	UAS Toll-2 vs Control		>0.1		1427±165.8			< 0.0001
	brain	MyD88 Gal4 [NP6394] UAS histone YFP/UAS Toll-2 [EP709]; tubulinGl80ts/UAS Rbf[280]	13	UAS Toll-2 vs UAS Toll-2 UAS Rbf		>0.1		1015±97.72			< 0.0001
Fig.5A Adult Medulla		Genotype	Number of adult OL			Kolmogorov-Smirnov	Bartlett's test	Mean±s.d.
	Counts of YFP cell	Toll-2pTV Gal4 UAS histoneYFP/+;tubulinGal80ts/+	17		One Way ANOVA	>0.1	0.3995	257.3±48.60	F=32.63,d.f.1=2,d.f.2=45	< 0.0001	Bonferroni's
	in adult optic lobe	Toll-2pTV Gal4 UAS histone YFP/UAS Toll-2 [EP709]; tubulinGl80ts/+	13	UAS Toll-2 vs Control		>0.1		437.9±67.86			< 0.0001
	medulla	Toll-2pTV Gal4 UAS histone YFP/UAS Toll-2 [EP709]; tubulinGl80ts/UAS Rbf[280]	18	UAS Toll-2 vs UAS Toll-2 UAS Rbf		>0.1		334±65.39			< 0.0001
Fig.5B,C		Genotype	Number of adult brains
	MARCM clone in D2 Adult	Elav Gal4, UAS mCD8 GFP, hs-FLP/Y; neoFRT 42D, tubpGal80/neoFRT42D	12
		Elav Gal4, UAS mCD8 GFP, hs-FLP/Y; neoFRT 42D, tubpGal80/neoFRT42D; UAS Toll-2 attP2/+	17
Fig.5H Pupa Central Brain		Genotype	Number of pupal brain			Kolmogorov-Smirnov	Levene's test	Mean±s.d.
	Counts of GFP cells	PCNA-GFP, hs Gal4/+	5		Mann-Whitney Test	>0.1	N/A	27.4 ± 8.735		0.0854
	in D4 pupal central	PCNA-GFP, hs Gal4/+; UAS Toll-2 EP709/+	11	UAS Toll-2 vs Control		p=0.0409, S=-0.4436, K=-1.522		68 ± 37.65
	brain
Fig.5H Adult Central Brain		Genotype	Number of adult brain			Kolmogorov-Smirnov	Levene's test	Mean±s.d.
	Counts of GFP cells	PCNA-GFP,hs Gal4/+	14		Mann-Whitney Test	>0.1	N/A	4.143 ±3.549		0.2261
	in D1 Adult central	PCNA-GFP,hs Gal4/+; UAS Toll-2 EP709/+	15	UAS Toll-2 vs Control		p=0.0482, S=1.375, K=1.333		6.8 ± 5.918
	brain
Fig.5I Adult Central Brain		Genotype	Number of adult brain
	String-GFP expression in	Toll-2 pTV Gal4/+; Stg-GFP[YD0685]/TubulinGal80ts	8
	D2 Adult brain	Toll-2 pTV Gal4/UAS Toll-2 [EP709]; Stg-GFP[YD0685]/TubulinGal80ts	8
Fig.6D Adult central brain		Genotype	Number of adult brain			Kolmogorov-Smirnov	Levene's test	Mean±s.d.
	Counts of E2F-GFP,	MyD88 Gal4/+; Tubulin Gal80ts/UAS FUCCI (UAS GFP-E2F UAS mRFP-CycB)	13	N/A	N/A	N/A	N/A	N/A	N/A	N/A	N/A
	or CycB-RFP, or GFP+	MyD88 Gal4/UAS Toll-2 EP709; Tubulin Gal80ts/UAS FUCCI (UAS GFP-E2F UAS mRFP-CycB)	11
	RFP+ cells
Fig.6H-J		Genotype	Number of adult brain
	Expression of Toll-2 cells	Toll-2 pTV Gal4 /UAS histone YFP	5
	doubled stained with Dpn
	Expression of Toll-2 cells	Toll-2 pTV Gal4 /UAS histone YFP	3
	doubled stained with Miranda
Fig.7D Medulla		Genotype	Number of OL			Kolmogorov-Smirnov	Levene's test	Mean±s.d.
	Counts of Yki-GFP cells	Toll-2pTV Gal4/Yki-GFP; Tubulin Gal80ts/+	11	N/A	N/A	N/A	N/A	N/A	N/A	N/A	N/A
	in D2 adult medulla	Toll-2pTV Gal4/Yki-GFP; Tubulin Gal80ts/UAS Toll-2 attP2	9
Fig.7D SOG		Genotype	Number of adult brain			Kolmogorov-Smirnov	Levene's test	Mean±s.d.
	Counts of Yki-GFP cells	Toll-2pTV Gal4/Yki-GFP; Tubulin Gal80ts/+	13	N/A	N/A	N/A	N/A	N/A	N/A	N/A	N/A
	in D2 adult	Toll-2pTV Gal4/Yki-GFP; Tubulin Gal80ts/UAS Toll-2 attP2	13
	Sub-esophageal ganglion
Fig.7D Anterior		Genotype	Number of adult brain			Kolmogorov-Smirnov	Levene's test	Mean±s.d.
	Counts of Yki-GFP cells	Toll-2pTV Gal4/Yki-GFP; Tubulin Gal80ts/+	12	N/A	N/A	N/A	N/A	N/A	N/A	N/A	N/A
	in D2 adult	Toll-2pTV Gal4/Yki-GFP; Tubulin Gal80ts/UAS Toll-2 attP2	13
	Top-left anterior corner
Fig.7E'		Genotype	Number of adult brain			Kolmogorov-Smirnov	Bartlett's test	Mean±s.d.
	Counts of YFP cell	MyD88 Gal4 [NP6394] UAS histoneYFP;tubulinGal80ts/+	24		One Way ANOVA	>0.1	0.0902	585.8±117.9	F=142.5, d.f.1=3, d.f.2=58	< 0.0001	Bonferroni's
	in adult central	MyD88 Gal4 [NP6394] UAS histone YFP/UAS Toll-2 EP709;tubulinGal80ts/+	11	UAS Toll-2 vs Control		>0.1		1427±165.8			< 0.0001
	brain	MyD88 Gal4 [NP6394] UAS histone YFP;tubulinGal80ts/UAS yki RNAi [JF03119]	10	UAS Yki RNAi vs Control		>0.1		752.2±70.79			0.0027
		MyD88 Gal4 [NP6394] UAS histone YFP/UAS Toll-2 EP709;tubulinGal80ts/UAS yki RNAi [JF03119]	17	UAS Toll-2 UAS Yki RNAi vs Control		>0.1		601.8±106.1			>0.9999
				UAS Toll-2 UAS Yki RNAi vs UAS Toll-2							< 0.0001
				UAS Toll-2 UAS Yki RNAi vs UAS Yki RNAi							0.0144
Fig.7F		Genotype	Number of adult brain			Kolmogorov-Smirnov	Bartlett's test	Mean±s.d.
	Counts of YFP cell	MyD88 Gal4 [NP6394] UAS histoneYFP;tubulinGal80ts/+	10		One Way ANOVA	>0.1	0.351	597.5±76.02	F=10.62, d.f.1=3, d.f.2=2	< 0.0001	Bonferroni's
	in adult central	MyD88 Gal4 [NP6394] UAS histone YFP;tubulinGal80ts/UAS Toll-2 attP2	10	UAS Toll-2 vs Control		>0.1		807±108.2			< 0.0001
	brain	MyD88 Gal4 [NP6394] UAS histone YFP/UAS Wek RNAi [GLV21045]; tubulinGal80ts/+	11	UAS Wek RNAi vs Control		>0.1		682.6±60.99			0.135
		MyD88 Gal4 [NP6394] UAS histone YFP/UAS Wek RNAi [GLV21045]; tubulinGal80ts/UAS Toll-2 attP2	14	UAS Wek RNAi UAS Toll-2 vs Control		>0.1		681±86.43			0.1241
				UAS Wek RNAi vs UAS Toll-2							0.0074
				UAS Toll-2 UAS Wek RNAi vs UAS Toll-2							0.0046
Fig.8B Brain area		Genotype	Number of pupal brain			Kolmogorov-Smirnov	Bartlett's test	Mean±s.d.
		Toll-2pTV Gal4 UAS histoneYFP/+	5	Each to control	One Way ANOVA	>0.1	0.2227	163606±15323	F=3.803, d.f.1=6, d.f.2=43	P = 0.0040	Dunnett post-hoc
	Measurements of	Toll-2pTV Gal4 UAS histoneYFP/UAS Toll-2RNAi [V36305];UAS Toll-7RNAi [NIG III] /UAS Toll-1RNAi [JF01276]	13	UAS Toll-7,2,1 RNAi New lines vs control		>0.1		136816±17438			0.012
	D4 pupal brain size	Toll-2pTV Gal4 UAS histoneYFP/UAS Toll-7RNAi [NIG II];UAS Toll-2RNAi [HM05241]/UAS Toll-1RNAi [JF01491]	5	UAS Toll-7,2,1 RNAi Old lines vs control		>0.1		142862±11155			0.1784
		Toll-2pTV Gal4 UAS histoneYFP/UAS Toll-2RNAi [V36305];UAS Toll-7RNAi [NIG III] /UAS Toll-8RNAi [V27098]	6	UAS Toll-7,2,8 RNAi New lines vs control		>0.1		136772±13173			0.0354
		Toll-2pTV Gal4 UAS histoneYFP/UAS Toll-7RNAi [NIG II];UAS Toll-2RNAi [HM05241]/UAS Toll-8RNAi [HM05005]	5	UAS Toll-7,2,8 RNAi Old lines vs control		>0.1		140199±23850			0.1032
		Toll-2pTV Gal4 UAS histoneYFP/UAS Toll-6RNAi [V928];UAS Toll-2RNAi [V44386]/UAS Toll-7RNAi [NIG III]	9	UAS Toll-7,2,6 RNAi New lines vs control		>0.1		147063±16467			0.2583
		Toll-2pTV Gal4 UAS histoneYFP/UAS Toll-7RNAi [NIG II];UAS Toll-2RNAi [HM05241]/UAS Toll-6RNAi [HMS04251]	7	UAS Toll-7,2,6 RNAi Old lines vs control		>0.1		122327±6527			0.0003
Fig.8B OL area		Genotype	Number of pupal OL			Kolmogorov-Smirnov	Bartlett's test	Mean±s.d.
		Toll-2pTV Gal4 UAS histoneYFP/+	10	Each to control	One Way ANOVA	>0.1	0.2234	37713±4604	F=7.585, d.f.1=6, d.f.2=93	< 0.0001	Dunnett post-hoc
	Measurements of	Toll-2pTV Gal4 UAS histoneYFP/UAS Toll-2RNAi [V36305];UAS Toll-7RNAi [NIG III] /UAS Toll-1RNAi [JF01276]	26	UAS Toll-7,2,1 RNAi New lines vs control		>0.1		28821±4399			< 0.0001
	D4 pupal OL size	Toll-2pTV Gal4 UAS histoneYFP/UAS Toll-7RNAi [NIG II];UAS Toll-2RNAi [HM05241]/UAS Toll-1RNAi [JF01491]	10	UAS Toll-7,2,1 RNAi Old lines vs control		>0.1		26879±4308			< 0.0001
		Toll-2pTV Gal4 UAS histoneYFP/UAS Toll-2RNAi [V36305];UAS Toll-7RNAi [NIG III] /UAS Toll-8RNAi [V27098]	12	UAS Toll-7,2,8 RNAi New lines vs control		>0.1		29756±5099			0.0022
		Toll-2pTV Gal4 UAS histoneYFP/UAS Toll-7RNAi [NIG II];UAS Toll-2RNAi [HM05241]/UAS Toll-8RNAi [HM05005]	10	UAS Toll-7,2,8 RNAi Old lines vs control		>0.1		31743±7849			0.047
		Toll-2pTV Gal4 UAS histoneYFP/UAS Toll-6RNAi [V928];UAS Toll-2RNAi [V44386]/UAS Toll-7RNAi [NIG III]	18	UAS Toll-7,2,6 RNAi New lines vs control		>0.1		33572±5507			0.1713
		Toll-2pTV Gal4 UAS histoneYFP/UAS Toll-7RNAi [NIG II];UAS Toll-2RNAi [HM05241]/UAS Toll-6RNAi [HMS04251]	14	UAS Toll-7,2,6 RNAi Old lines vs control		>0.1		26294±3728			< 0.0001
Fig.8D		Genotype	Number of pupal MB			Kolmogorov-Smirnov	Bartlett's test	Mean±s.d.
		Toll-2pTV Gal4 UAS histoneYFP/+	10	Each to control	Kruskal-Wallis test	0.0318	N/A	57.94±12.18	N/A	0.0127	Dunn's
	Measurements of	Toll-2pTV Gal4 UAS histoneYFP/UAS Toll-2RNAi [V36305];UAS Toll-7RNAi [NIG III] /UAS Toll-1RNAi [JF01276]	19	UAS Toll-7,2,1 RNAi New lines vs control		>0.1		77.26±13.34			0.0013
	D4 pupal MBKC	Toll-2pTV Gal4 UAS histoneYFP/UAS Toll-7RNAi [NIG II];UAS Toll-2RNAi [HM05241]/UAS Toll-1RNAi [JF01491]	10	UAS Toll-7,2,1 RNAi Old lines vs control		>0.1		71.87±12.92			0.0628
	cluster depth	Toll-2pTV Gal4 UAS histoneYFP/UAS Toll-2RNAi [V36305];UAS Toll-7RNAi [NIG III] /UAS Toll-8RNAi [V27098]	12	UAS Toll-7,2,8 RNAi New lines vs control		>0.1		65.29±12.86			> 0.9999
		Toll-2pTV Gal4 UAS histoneYFP/UAS Toll-7RNAi [NIG II];UAS Toll-2RNAi [HM05241]/UAS Toll-8RNAi [HM05005]	10	UAS Toll-7,2,8 RNAi Old lines vs control		>0.1		68.78±6.503			0.2098
		Toll-2pTV Gal4 UAS histoneYFP/UAS Toll-6RNAi [V928];UAS Toll-2RNAi [V44386]/UAS Toll-7RNAi [NIG III]	18	UAS Toll-7,2,6 RNAi New lines vs control		>0.1		70.78±12.28			0.0729
		Toll-2pTV Gal4 UAS histoneYFP/UAS Toll-7RNAi [NIG II];UAS Toll-2RNAi [HM05241]/UAS Toll-6RNAi [HMS04251]	14	UAS Toll-7,2,6 RNAi Old lines vs control		>0.1		70.28±14.24			0.1554
Fig.8E		Genotype	Number of pupal MB			Kolmogorov-Smirnov	Brown-Forsythe test	Mean±s.d.
		Toll-2pTV Gal4 UAS histoneYFP/+	15	Each to control	One Way ANOVA	> 0.1000	0.7171	1828±185.8	F=1.958, d.f.1=6, d.f.2=64	0.0849	Dunnett post-hoc
	No. of YFP cell in	Toll-2pTV Gal4 UAS histoneYFP/UAS Toll-2RNAi [V36305];UAS Toll-7RNAi [NIG III] /UAS Toll-1RNAi [JF01276]	11	UAS Toll-7,2,1 RNAi New lines vs control		> 0.1000		1861±307.0			0.9996
	D4 pupal MB	Toll-2pTV Gal4 UAS histoneYFP/UAS Toll-7RNAi [NIG II];UAS Toll-2RNAi [HM05241]/UAS Toll-1RNAi [JF01491]	2	UAS Toll-7,2,1 RNAi Old lines vs control		N/A		1802±305.5			0.9998
		Toll-2pTV Gal4 UAS histoneYFP/UAS Toll-2RNAi [V36305];UAS Toll-7RNAi [NIG III] /UAS Toll-8RNAi [V27098]	13	UAS Toll-7,2,8 RNAi New lines vs control		> 0.1000		1632±321.7			0.2537
		Toll-2pTV Gal4 UAS histoneYFP/UAS Toll-7RNAi [NIG II];UAS Toll-2RNAi [HM05241]/UAS Toll-8RNAi [HM05005]	6	UAS Toll-7,2,8 RNAi Old lines vs control		0.0622		1631±264.0			0.4861
		Toll-2pTV Gal4 UAS histoneYFP/UAS Toll-6RNAi [V928];UAS Toll-2RNAi [V44386]/UAS Toll-7RNAi [NIG III]	15	UAS Toll-7,2,6 RNAi New lines vs control		> 0.1000		1619±272.7			0.1761
		Toll-2pTV Gal4 UAS histoneYFP/UAS Toll-7RNAi [NIG II];UAS Toll-2RNAi [HM05241]/UAS Toll-6RNAi [HMS04251]	9	UAS Toll-7,2,6 RNAi Old lines vs control		> 0.1000		1570±293.7			0.1298
Fig.8G		Genotype	Number of adult MB			Kolmogorov-Smirnov	Bartlett's test	Mean±s.d.
	No. of YFP cell in	Toll-2 pTV Gal4 UAS histone YFP/+;TubulinGal80ts/+	15	Each to control	Kruskal-Wallis test	0.0599	N/A	1718±135.4	N/A	< 0.0001	Dunn's
	D2 adult MB	Toll-2 pTV Gal4 UAS histone YFP/UAS Toll-7 RNAi [NIG II];TubulinGal80ts/UAS Toll-6 RNAi [HMS04251]	11	UAS Toll-6 RNAi UAS Toll-7 RNAi vs Control		0.0999		2269±247.0			0.0023
		Toll-2 pTV Gal4 UAS histone YFP/UAS Toll-6 RNAi [V928];TubulinGal80ts/UAS Toll-2 RNAi [V44386]	20	UAS Toll-2 RNAi UAS Toll-6 RNAi vs Control		p=0.0029, S=1.228, K=1.043		1617±232.1			0.2083
Fig.8H		Genotype	Number of adult MB			Kolmogorov-Smirnov	Bartlett's test	Mean±s.d.
	Measurements of	Toll-2 pTV Gal4 UAS histone YFP/+;TubulinGal80ts/+	20	Each to control	One Way ANOVA	> 0.1000	0.175	48.96±7.019	F=3.019, d.f.1=2, d.f.2=57	0.0567	Dunnett post-hoc
	D2 Ad MBKC	Toll-2 pTV Gal4 UAS histone YFP/UAS Toll-7 RNAi [NIG II];TubulinGal80ts/UAS Toll-6 RNAi [HMS04251]	20	UAS Toll-6 RNAi UAS Toll-7 RNAi vs Control		> 0.1000		55.36±7.122			0.0318
	cluster depth	Toll-2 pTV Gal4 UAS histone YFP/UAS Toll-6 RNAi [V928];TubulinGal80ts/UAS Toll-2 RNAi [V44386]	20	UAS Toll-2 RNAi UAS Toll-6 RNAi vs Control		> 0.1000		52.15±10.17			0.3721
Fig.8J		Genotype	Number of adult brain			Kolmogorov-Smirnov	Bartlett's test	Mean±s.d.
	Measurements of D2 adult	MyD88 Gal4 [NP6394] UAS histone YFP/+;TubulinGal80ts/+	48	Each to control	One Way ANOVA	> 0.1000	0.0907	138585±14338	F=2.635, d.f.1=2, d.f.2=66	P = 0.0793	Dunnett post-hoc
	brain size	MyD88 Gal4 [NP6394] UAS histone YFP/UAS Toll-2 EP709;TubulinGal80ts/+	11	UAS Toll-2 EP709 vs Control		> 0.1000		146177±11495			0.1583
		MyD88 Gal4 [NP6394] UAS histone YFP/+;TubulinGal80ts/UAS Toll-2 attP2	10	UAS Toll-2 attP2 vs Control		> 0.1000		146861±7585			0.1346
		MyD88 Gal4 [NP6394] UAS histone YFP/+;TubulinGal80ts/+	48	Each to control	Kruskal-Wallis test	> 0.1000	N/A	138585±14338	N/A	< 0.0001	Dunn's
		MyD88 Gal4 [NP6394] UAS histone YFP;TubulinGal80ts/UAS Wek HA	25	UAS Wek vs Control		> 0.1000		158913±13133			< 0.0001
		MyD88 Gal4 [NP6394] UAS histone YFP/UAS MyD88 RNAi [V25042];TubulinGal80ts/+	16	UAS MyD88 RNAi vs Control		p=0.0132, S=-0.6974, K=-0.5056		166603±14823			< 0.0001
		MyD88 Gal4 [NP6394] UAS histone YFP/UAS MyD88 RNAi [V25042];TubulinGal80ts/UAS Wek HA	10	UAS MyD88 RNAi UAS Wek vs Control		> 0.1000		135661±14785			> 0.9999
		MyD88 Gal4 [NP6394] UAS histone YFP/+;TubulinGal80ts/+	48	Each to control	One Way ANOVA	> 0.1000	0.0519	138585±14338	F=3.344, d.f.1=3, d.f.2=82	0.0135	Tukey post-hoc
		MyD88 Gal4 [NP6394] UAS histone YFP/UAS Toll-2 EP709;TubulinGal80ts/+	11	UAS Toll-2 EP709 vs Control		> 0.1000		146861±7585			ns
		MyD88 Gal4 [NP6394] UAS histone YFP/+;TubulinGal80ts/UAS Yki RNAi [JF03119]	10	UAS Yki RNAi vs Control		> 0.1000		150011±23659			*
		MyD88 Gal4 [NP6394] UAS histone YFP/UAS Toll-2 EP709;TubulinGal80ts/UAS Yki RNAi [JF03119]	18	UAS Toll-2 EP709 UAS Yki RNAi vs Control		> 0.1000		134206±12241			ns
				UAS Toll-2 EP709 vs UAS Yki RNAi							ns
				UAS Toll-2 EP709 vs UAS Toll-2 EP709 UAS Yki RNAi							ns
				UAS Yki RNAi vs UAS Toll-2 EP709 UAS Yki RNAi							*
Fig.8K		Genotype	Number of adult brain			Kolmogorov-Smirnov	Bartlett's test	Mean±s.d.
	Measurements of D2 adult	MyD88 Gal4 [NP6394] UAS histone YFP/+;TubulinGal80ts/+	48	N/A	N/A	N/A	N/A	N/A	N/A	N/A	N/A
	brain size	MyD88 Gal4 [NP6394] UAS histone YFP/UAS Toll-2 EP709;TubulinGal80ts/+	11
		MyD88 Gal4 [NP6394] UAS histone YFP/+;TubulinGal80ts/UAS Toll-2 attP2	10
		MyD88 Gal4 [NP6394] UAS histone YFP/+;TubulinGal80ts/+	48	N/A	N/A	N/A	N/A	N/A	N/A	N/A	N/A
		MyD88 Gal4 [NP6394] UAS histone YFP;TubulinGal80ts/UAS Wek HA	25
		MyD88 Gal4 [NP6394] UAS histone YFP/UAS MyD88 RNAi [V25042];TubulinGal80ts/+	16
		MyD88 Gal4 [NP6394] UAS histone YFP/UAS MyD88 RNAi [V25042];TubulinGal80ts/UAS Wek HA	10
		MyD88 Gal4 [NP6394] UAS histone YFP/+;TubulinGal80ts/+	48	N/A	N/A	N/A	N/A	N/A	N/A	N/A	N/A
		MyD88 Gal4 [NP6394] UAS histone YFP/UAS Toll-2 EP709;TubulinGal80ts/+	10
		MyD88 Gal4 [NP6394] UAS histone YFP/+;TubulinGal80ts/UAS Yki RNAi [JF03119]	10
		MyD88 Gal4 [NP6394] UAS histone YFP/UAS Toll-2 EP709;TubulinGal80ts/UAS Yki RNAi [JF03119]	18
Fig.S2 C pupa		Genotype	No. of KC cluster			Kolmogorov-Smirnov	Levene's test	Mean±s.d.
	Counts of YFP cells	MB Gal4/UAS histone YFP	13		Mann-Whitney U	S=-2.04 K=5.159	N/A	1440 ± 91.99		0.11	N/A
	in pupal MB	MB Gal4/UAS histone YFP; UAS Toll-2 attP2/+	13	Control vs UAS Toll-2		> 0.1000		1393 ± 101.4
Fig.S2 C Adult		Genotype	No. of KC cluster			Kolmogorov-Smirnov	F test	Mean±s.d.
	Counts of YFP cells	MB Gal4/UAS histone YFP	15		Unpaired t-test	> 0.1000	0.1897	1675 ± 123.1	t=1.399 df=34	0.1708	N/A
	in adult MB	MB Gal4/UAS histone YFP; UAS Toll-2 attP2/+	21	Control vs UAS Toll-2		> 0.1000		1602 ±173.8
Fig.S3 A		Genotype	Number of adult flies
	Survival index	.+/SM6a TM6B x +/SM6a TM6B	341	Each to control	Chi-Square	N/A	N/A	Categorical data		<0.0001	Chi-Square	Bonferroni x 3
		Toll-2pTV/SM6a TM6B x 18wD7-35/SM6aTM6B	2399	.+/+ vs Toll-2 pTV/18wD7-35					X=27.15, df=1		<0.0001	<0.0001
		Toll-2pTV/SM6a TM6B x DfBSC594/SM6aTM6B	1984	.+/+ vs Toll-2 pTV/DfBSC594					x=24.91, df=1			<0.0001
		DfBSC594/SM6a TM6B x 18wD7-35/SM6aTM6B	932	.+/+ vs DfBSC594/18wD7-35					x=116.4, df=1			<0.0001
Fig.S3 B		Genotype	No. of adult flies
	Longevity of adult	Oregon/CantonS	119	N/A	N/A	N/A	N/A	N/A	N/A	N/A	N/A
	flies	Toll-2pTV/18wD7-35	91
Fig.S3 C		Genotype	Number of adult flies					Mean±s.d.
	Climbing assay in	Oregon/CantonS	134	Each to control	Chi-Square	N/A	N/A	Categorical data			Chi-Square	Bonferroni x 2
	adult flies	Toll-2pTV/18wD7-35	85	Toll-2 pTV/18wD7-35 vs Oregon/CantonS					X= 963.6, df=1		<0.0001	<0.0001
		Toll-2pTV/Df BSC594	78	Toll-2 pTV/DfBSC594 vs Oregon/CantonS					X= 1122, df=1			<0.0001
Fig.S4 A,B		Genotype	Number of adult brains					Mean±s.d.
	Expression of Sarm	UAS FlyBow [1.1 2906]; Ect4 Gal4 [NP7460]/+	5
		UAS FlyBow [1.1 2906]; Ect4 Gal4 [NP0257]/+	2
Fig.S4 C,D		Genotype	Number of adult brains					Mean±s.d.
	JNK expression in pupal brain	TRE-Red[9012]	9
	JNK expression in adult brain	TRE-Red[9012]	10
Fig.S4 E,F		Genotype	Number of adult brains					Mean±s.d.
	FoxO expression in pupal brain	anti-FoxO in yw	8
	FoxO expression in adult brain	anti-FoxO in yw	10
Fig.S4 G,H		Genotype	Number of adult brains					Mean±s.d.
	Dif expression in pupal brain	w;;PBac{Dif-GFP.FPTB}VK00033	5
	Dif expression in adult brain	w;;PBac{Dif-GFP.FPTB}VK00033	3
Fig.S4 I,J		Genotype	Number of adult brains					Mean±s.d.
	Dorsal expression in pupal brain	w;;PBac{Dorsal-GFP.FPTB}VK00033	3
	Dorsal expression in adult brain	w;;PBac{Dorsal-GFP.FPTB}VK00033	7
Fig.S5 A		Genotype	Numer of D4 pupal brain			Kolmogorov-Smirnov	Bartlett's test	Mean±s.d.
	Central brain size	Toll-2pTV Gal4 UAS histoneYFP/+	5	Each to control	One Way ANOVA	0.0888	0.4086	89036±8690	F=6.903, d.f.1=3, d.f.2=18	0.0027	Dunnett post-hoc
		Toll-2pTV Gal4 UAS histoneYFP/UAS Toll-7RNAi [NIG II];UAS Toll-2RNAi [HM05241]/UAS Toll-1RNAi [JF01491]	5	UAS Toll-7,2,1 RNAi lines vs control		> 0.1000		87759±6736			0.9956
		Toll-2pTV Gal4 UAS histoneYFP/UAS Toll-7RNAi [NIG II];UAS Toll-2RNAi [HM05241]/UAS Toll-8RNAi [HM05005]	5	UAS Toll-7,2,8 RNAi lines vs control		> 0.1000		74421±10200			0.1263
		Toll-2pTV Gal4 UAS histoneYFP/UAS Toll-7RNAi [NIG II];UAS Toll-2RNAi [HM05241]/UAS Toll-6RNAi [HMS04251]	7	UAS Toll-7,2,6 RNAi lines vs control		> 0.1000		63794±14833			0.003
Fig.S5 B		Genotype	Number of MB			Kolmogorov-Smirnov	Bartlett's test	Mean±s.d.
	MBKC cluster size	Toll-2pTV Gal4 UAS histoneYFP/+	10	Each to control	Kruskal-Wallis test	> 0.1000	N/A	7016±1245	N/A	< 0.0001	Dunn's
		Toll-2pTV Gal4 UAS histoneYFP/UAS Toll-7RNAi [NIG II];UAS Toll-2RNAi [HM05241]/UAS Toll-1RNAi [JF01491]	10	UAS Toll-7,2,1 RNAi lines vs control		> 0.1000		5242±818.9			0.0813
		Toll-2pTV Gal4 UAS histoneYFP/UAS Toll-7RNAi [NIG II];UAS Toll-2RNAi [HM05241]/UAS Toll-8RNAi [HM05005]	10	UAS Toll-7,2,8 RNAi lines vs control		p=0.0261, S=1.032, K=-0.7701		4974±716.5			0.0286
		Toll-2pTV Gal4 UAS histoneYFP/UAS Toll-7RNAi [NIG II];UAS Toll-2RNAi [HM05241]/UAS Toll-6RNAi [HMS04251]	14	UAS Toll-7,2,6 RNAi lines vs control		> 0.1000		4006±566.6			< 0.0001
Fig.S5 D		Genotype	Number of adult brain			Kolmogorov-Smirnov	F test	Mean±s.d.
	Counts of YFP cells	MyD88 Gal4 UAS histone YFP;TubulinGal80ts	10		unpaired t-test	> 0.1000	0.3808	597.5±76.02	t=8.819 df=18	< 0.0001	N/A
	in adult central brain	Toll-2 pTV Gal4 UAS histone YFP/UAS Toll-6 RNAi [V928];TubulinGal80ts/UAS Toll-2 RNAi [V44386]	10	UAS Toll-2 RNAi UAS Toll-6 RNAi vs Control		> 0.1000		954.2±102.9
Fig.S5 F		Genotype	Number of adult brain			Kolmogorov-Smirnov	Bartlett's test	Mean±s.d.
	Measurements of D2 adult	Toll-2 pTV Gal4 UAS histone YFP;TubulinGal80ts	10	Each to control	Kruskal-Wallis test	> 0.1000	N/A	143841±7639	N/A	0.2481	Dunn's
	brain size	Toll-2 pTV Gal4 UAS histone YFP/UAS Toll-7 RNAi [NIG II];TubulinGal80ts/UAS Toll-6 RNAi [HMS04251]	10	UAS Toll-6 RNAi UAS Toll-7 RNAi vs Control		> 0.1000		141772±7576			> 0.9999
		Toll-2 pTV Gal4 UAS histone YFP/UAS Toll-6 RNAi [V928];TubulinGal80ts/UAS Toll-2 RNAi [V44386]	11	UAS Toll-2 RNAi UAS Toll-6 RNAi vs Control		p=0.0003, S=1.177, K=-0.3994		140537±19970			0.2449
